# Supplementary material for: Cytosporone B as a Biological Preservative: Purification, Fungicidal Activity and Mechanism of Action against Geotrichum citri-aurantii
Source: MDPI journal article supplement (doi:10.3390/biom9040125), 2019-03-29
Supplement: s1 [file s1]

Table S1: Raw data and quality analysis

| Samples | Read Number | Base Number   | GC Content | Q30    |
|---------|-------------|---------------|------------|--------|
| CK1     | 21,635,277  | 6,472,224,836 | 49.96%     | 87.38% |
| CK2     | 27,442,858  | 8,219,515,664 | 49.80%     | 87.14% |
| CK3     | 28,500,163  | 8,523,530,860 | 49.95%     | 86.94% |
| T1      | 24,109,625  | 7,214,171,494 | 49.02%     | 93.45% |
| T2      | 24,869,729  | 7,434,822,846 | 48.79%     | 93.63% |
| T3      | 23,856,426  | 7,149,200,002 | 49.82%     | 87.23% |

Table S2: Length range of the unigenes

| Length Range | Unigene        |
|--------------|----------------|
| 200-300      | 23,992(42.91%) |
| 300-500      | 13,939(24.93%) |
| 500-1000     | 9,217(16.49%)  |
| 1000-2000    | 5,136(9.19%)   |
| 2000+        | 3,622(6.48%)   |
| Total Number | 55906          |
| Total Length | 37227738       |
| N50 Length   | 1130           |

|             |       |
|-------------|-------|
| Mean Length | 665.9 |
|-------------|-------|

Table S3: Annotation of the unigenes

| Anno_Database        | Annotated_Number | 300<=length<1000 | length>=1000 |
|----------------------|------------------|------------------|--------------|
| COG_Annotation       | 11240            | 4612             | 3562         |
| GO_Annotation        | 24611            | 10781            | 4415         |
| KEGG_Annotation      | 10843            | 4400             | 3675         |
| KOG_Annotation       | 22067            | 9446             | 5294         |
| Pfam_Annotation      | 22222            | 9565             | 6656         |
| Swissprot_Annotation | 13471            | 5140             | 5388         |
| eggNOG_Annotation    | 35362            | 15306            | 7191         |
| nr_Annotation        | 36964            | 15850            | 7296         |
| All_Annotated        | 37302            | 15948            | 7380         |

Nr(NCBI nonredundant protein databases); COG (Clusters of Orthologous Groups); KOG (euKaryotic Orthologous Groups); GO(Gene Ontology); KEGG (Kyoto Encyclopedia of Genes and Genomes); Pfam (Protein family).

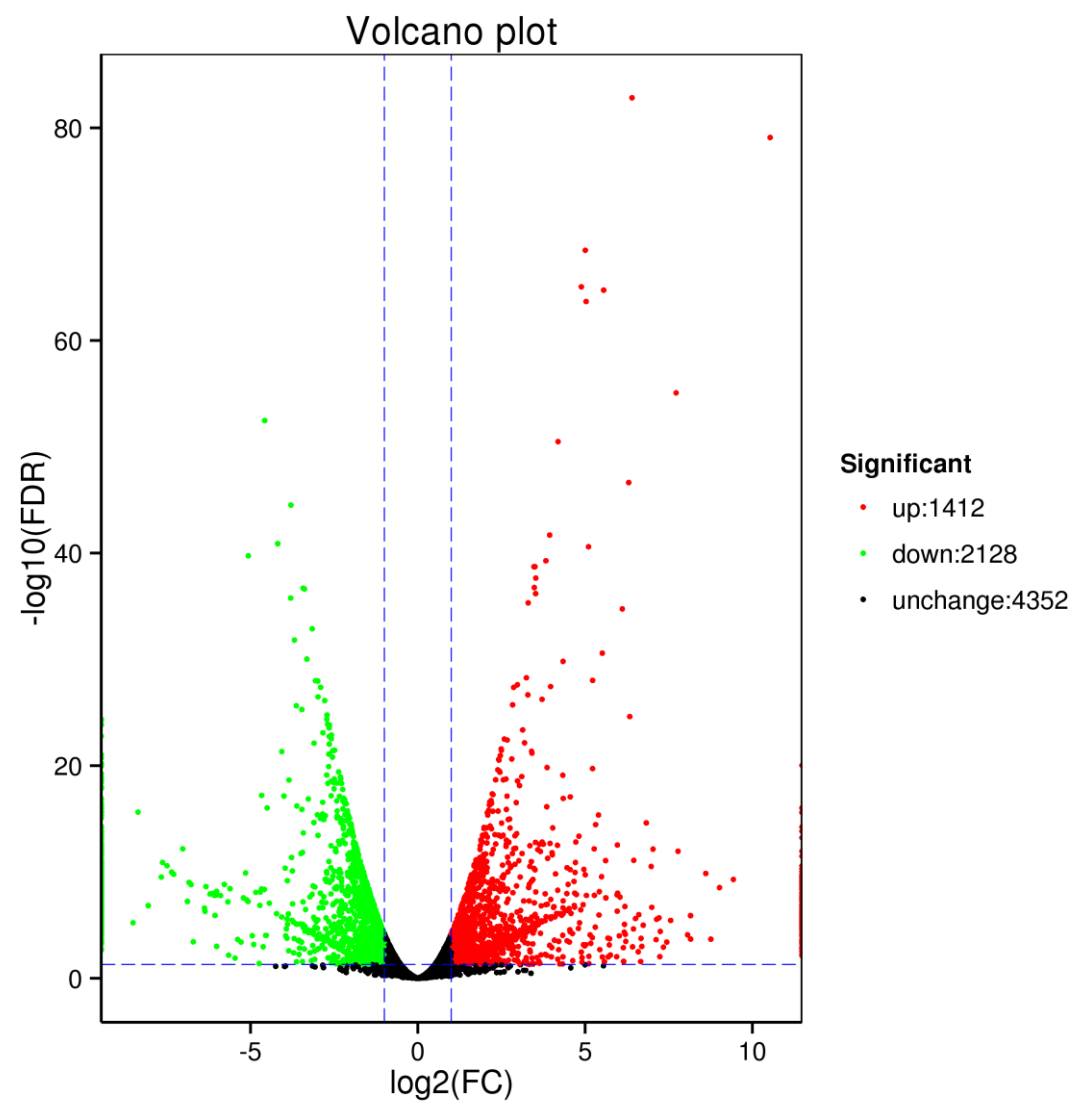

Figure S1: Volcano plot analyses of differentially expressed genes in *G. citri-aurantii* underlying the treatment of cytosporone B

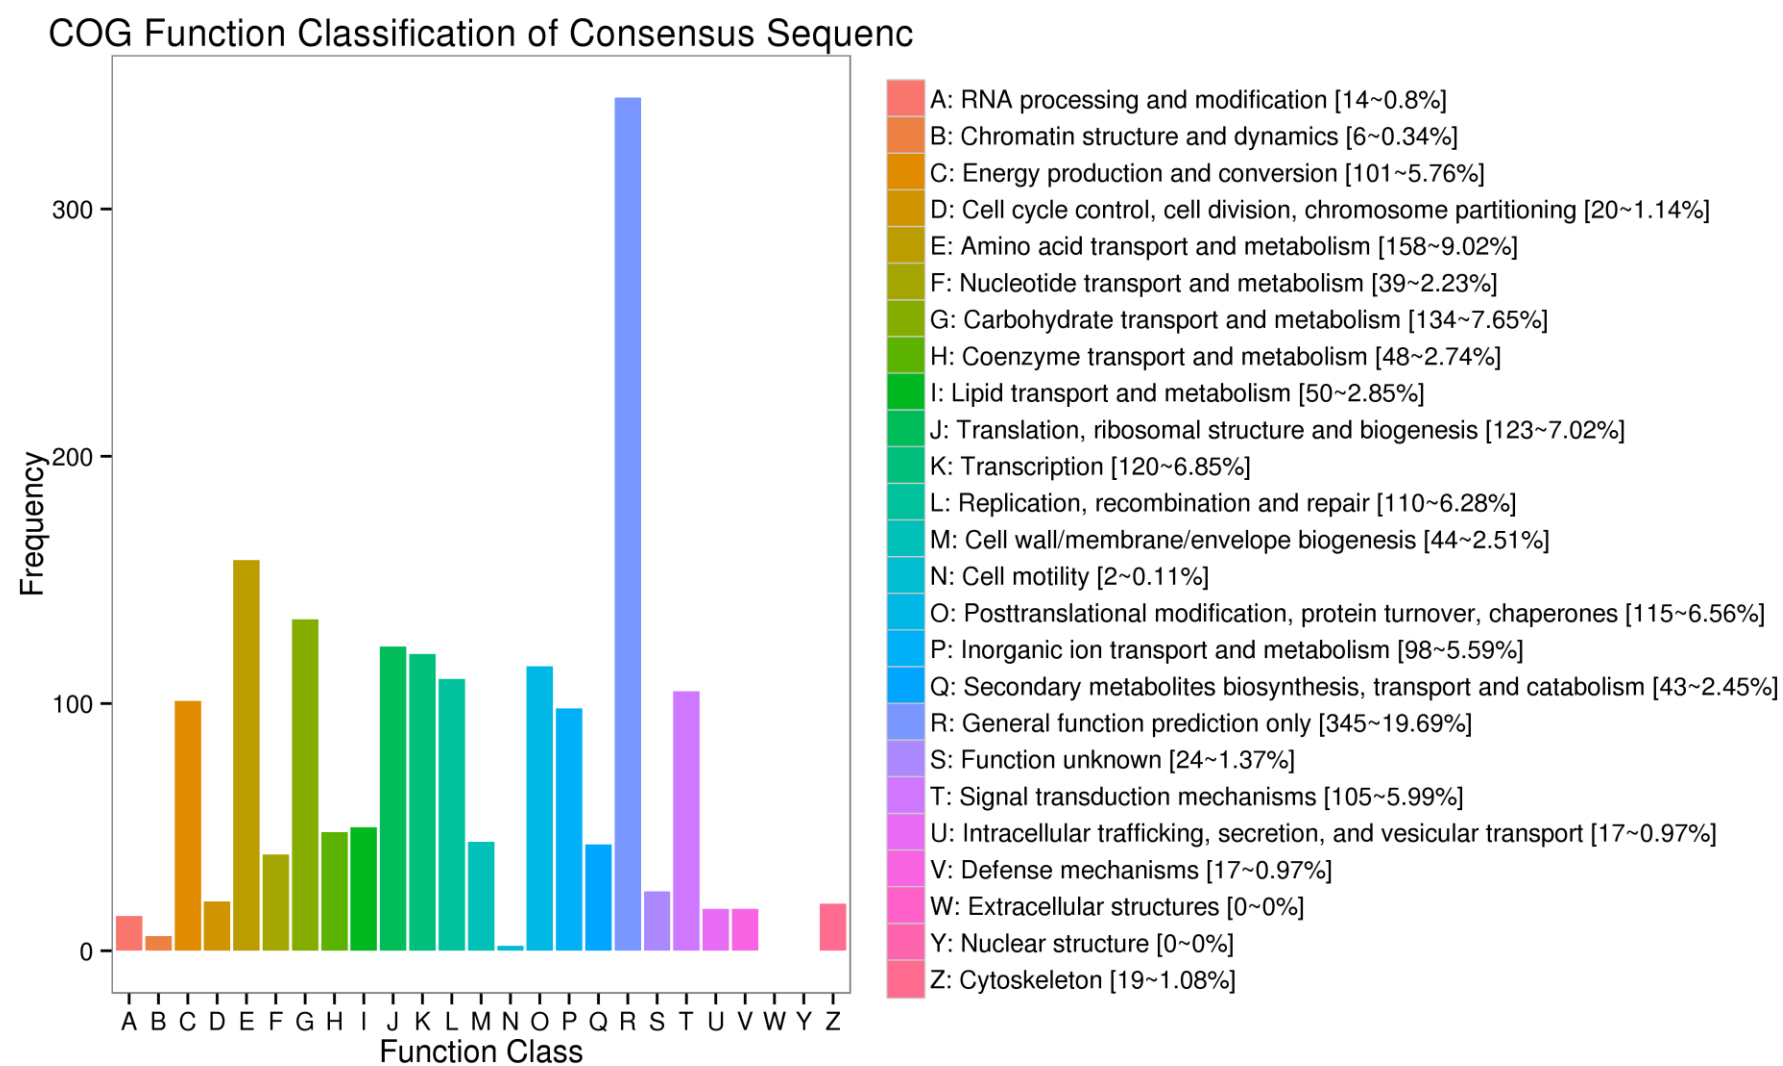

Figure S2: COG functional classification of unigenes

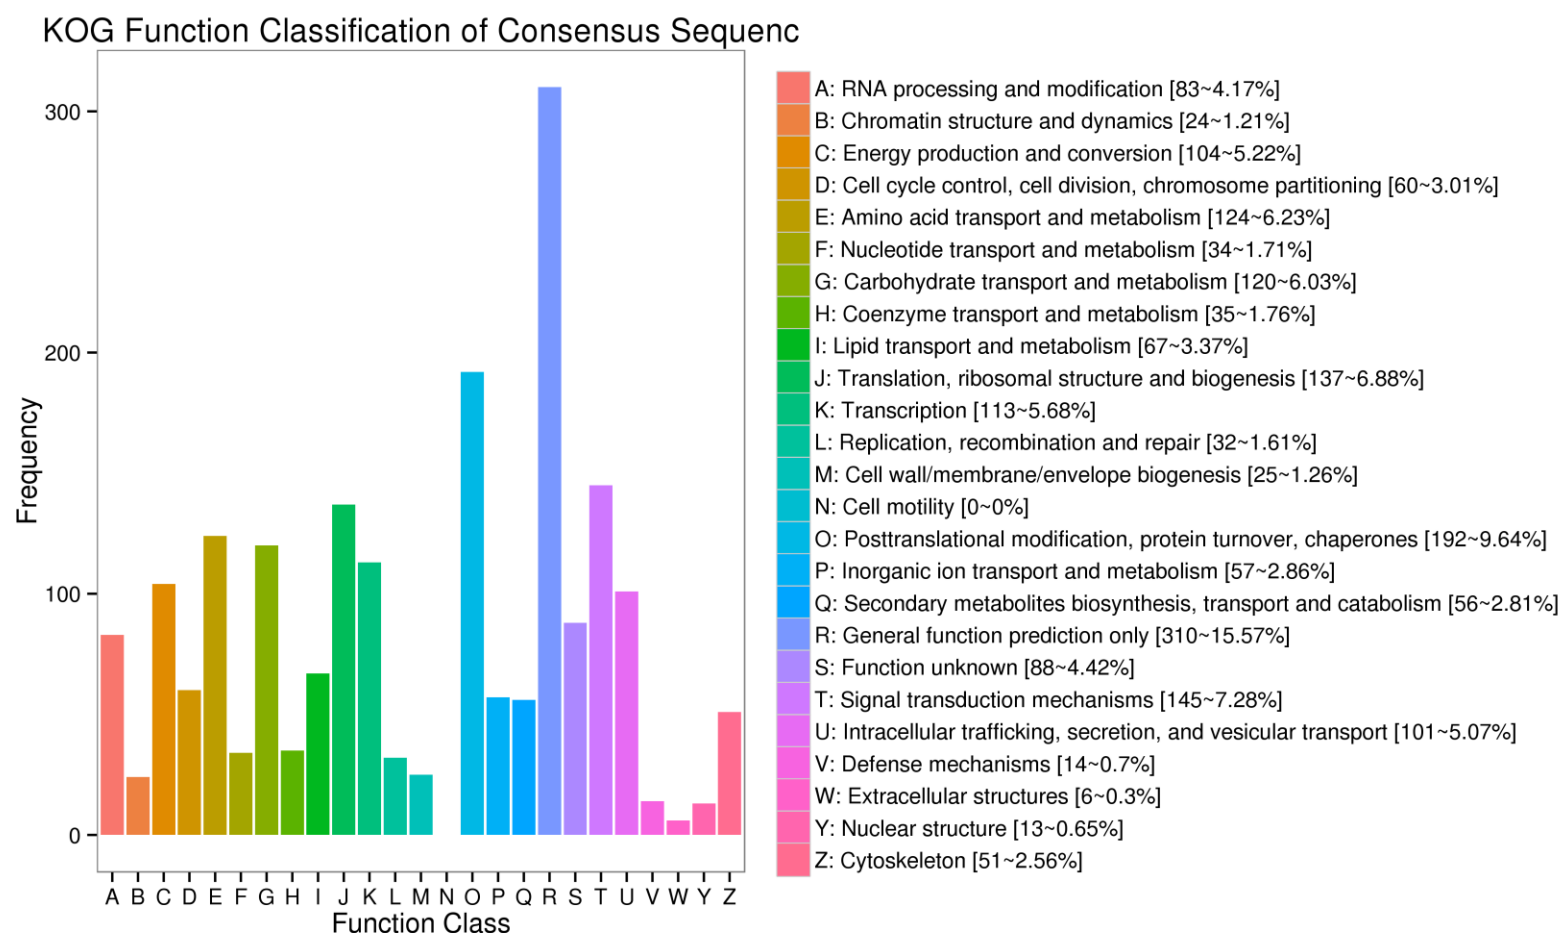

Figure S3: KOG functional classification of unigenes

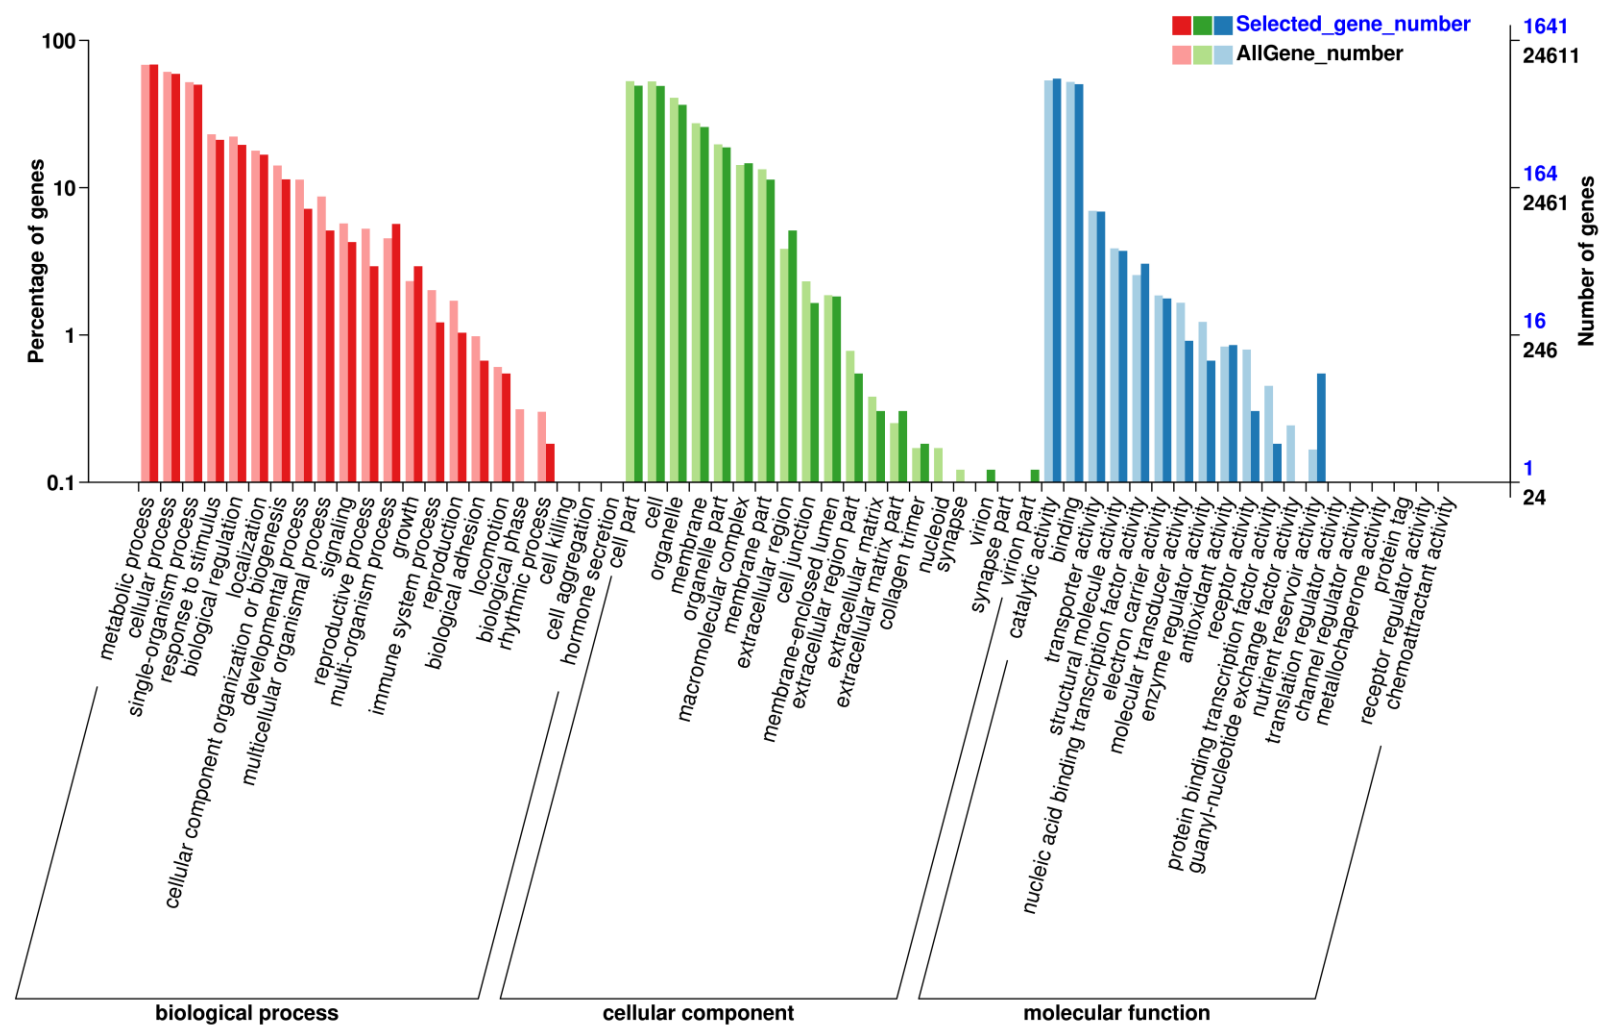

Figure S4: GO functional classification of unigenes
