# Supplementary material for: Cytosporone B as a Biological Preservative: Purification, Fungicidal Activity and Mechanism of Action against Geotrichum citri-aurantii
Source: MDPI journal article supplement (doi:10.3390/biom9040125), 2019-03-29
Supplement: s1 [file s1]

| Unigene name      | Sequence                         |
|-------------------|----------------------------------|
| c27184-F          | 5' GGGTTATGGATGATCTTATTGTGC 3'   |
| c27184-R          | 5' CCGACTTGCCGCTATCTGTAT 3'      |
| c26973-F          | 5' CTCCTGCTCAATGCCAAACCAAA 3     |
| c26973-R          | 5' CTGAGACCCGTTGCCATTTACCC 3     |
| c27242-F          | 5' CTGGTGGGCAAAGTCAAGCAA 3'      |
| c27242-R          | 5' TCCGCATTGTCAAGAGTAGAAACG 3'   |
| c26832-F          | 5' TGAATACCGTAGTTCCAACCAATAGC 3' |
| c26832-R          | 5' ACAATGGTGGTCCCGCTTCT 3'       |
| c26914-F          | 5' ACGATACGTTTGAGGCCACAGC 3'     |
| c26914-R          | 5' CATTACACGGCGACCAACCAC 3'      |
| c22418-F          | 5' TTCAGGCGGATCGTCGTTT 3'        |
| c22418-R          | 5' GCAGCATCGCATAGCTCACA 3'       |
| c28014-F          | 5' GAAGGCGTAAACTGCTCCAACAC 3'    |
| c28014-R          | 5' AGGGCCGCGACACTAGACAA 3'       |
| c28250-F          | 5' TATGTGGGTGTCTCAGCAGTCG 3'     |
| c28250-R          | 5' GGGTTCATTTGGCAAGGTCA 3'       |
| c14704-F          | 5' TTCCACCACCAACTGTCTCG 3'       |
| c14704-R          | 5' AATGGTCCCCTGTTGCTGTC 3'       |
| c27638-F          | 5' ATTGATCACGCTGGTTCG 3'         |
| c27638-R          | 5' GACCCTCAACGCTGAGC 3'          |
| Reference gene    | Sequence                         |
| $\beta$ -Actin-F: | 5' GAGCGGCCAATCTTGACAAAACC 3'    |
| $\beta$ -Actin-R: | 5' CAGCAACCCTCCATTTAGACACCAC 3'  |
